## Correction for: Mitochondrial fission regulator 2 (MTFR2) promotes growth, migration, invasion and tumour progression in breast cancer cells

Guanming Lu<sup>1,\*</sup>, Yuanhui, Lai<sup>2,\*</sup>, Tiantian Wang<sup>3,\*</sup>, Weihao Lin<sup>4</sup>, Jinlan Lu<sup>5</sup>, Yanfei Ma<sup>1</sup>, Yongcheng Chen<sup>1</sup>, Haiqing Ma<sup>6</sup>, Ruilei Liu<sup>7</sup>, Jie Li<sup>4,8</sup>

<sup>1</sup>Department of Breast and Thyroid Surgery, Affiliated Hospital of Youjiang Medical University for Nationalities, Basie, Guangxi, China

<sup>2</sup>Department of Breast and Thyroid Surgery, Eastern Hospital of the First Affiliated Hospital of Sun Yat-sen University, Guangzhou, Guangdong, China

<sup>3</sup>Department of Breast and Thyroid Surgery, Shandong Provincial Hospital Affiliated to Shandong University, Ji'nan, Shandong, China

<sup>4</sup>Department of Breast and Thyroid Surgery, First Affiliated Hospital of Sun Yat-sen University, Guangzhou, Guangdong, China

<sup>5</sup>Department of Stomatology, Affiliated Hospital of Youjiang Medical University for Nationalities, Basie, Guangxi, China

<sup>6</sup>Department of Oncology, Fifth Affiliated Hospital of Sun Yat-sen University, Zhuhai, Guangdong, China

<sup>7</sup>Department of Breast and Thyroid Surgery, Third Affiliated Hospital of Sun Yat-sen University, Guangzhou, Guangdong, China

<sup>8</sup>Division of Thyroid and Parathyroid Endocrine Surgery, Massachusetts Eye and Ear Infirmary, Harvard Medical School, Boston, MA 02114, USA

\*Equal contribution and co-first authors

**Correspondence to:** Jie Li, Haiqing Ma, Ruilei Liu; email: [lijie78@mail.sysu.edu.cn](mailto:lijie78@mail.sysu.edu.cn), [mahaiqing@mail.sysu.edu.cn](mailto:mahaiqing@mail.sysu.edu.cn), [liuruileipaper@163.com](mailto:liuruileipaper@163.com)

**Original article:** *Aging (Albany NY)* 2019; 11: 10203-10219.

PMID: 31740625

PMCID: PMC6914410

doi: [10.18632/aging.102442](https://doi.org/10.18632/aging.102442)

**This article has been corrected:** The authors requested to replace Figure 3 and Figure 6. The mistakes of these figures are described below:

**Figure 3:** the Westernblot of SDHB in Figure3B of MCF-7 flipped horizontally.

**Figure 6:** the Westernblot of CytC in Figure6B of MDA-231 was identical to Uqcrfs1 due to the layout mistakes.

These corrections do not change any of the conclusions of the publication. The corrected Figure 3 and Figure 6 are provided below.

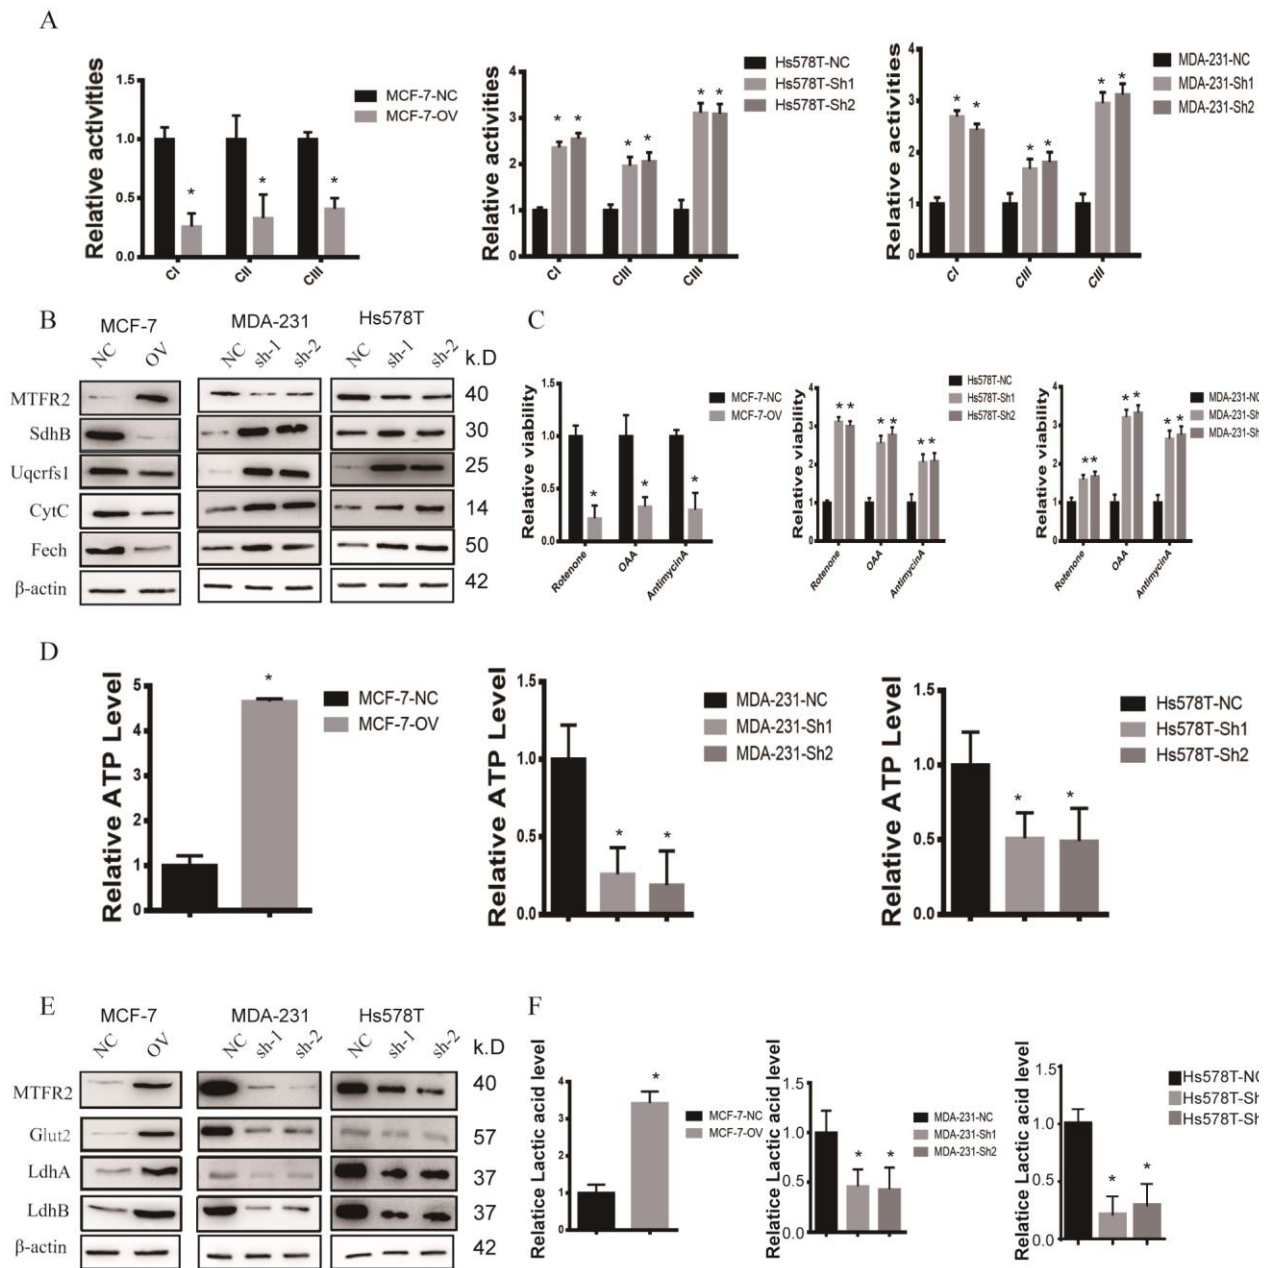

**Figure 3. MTFR promotes the glycolysis of BC.** (A) The relative activities of the CI CII and CIII of different cell lines (Student's two one-tailed paired test \*  $p < 0.05$ ). (B) Western blot of OXPHOS markers of different cell lines. (C) The relative viability of different cell lines treated with different inhibitors (Student's two one-tailed paired test \*  $p < 0.05$ ). (D) The relative ATP level of different cell lines (Student's two one-tailed paired test \*  $p < 0.05$ ). (E) Western blot of glycolysis markers of different cell lines. (F) The relative lactic acid level of different cell lines (Student's two one-tailed paired test \*  $p < 0.05$ ).

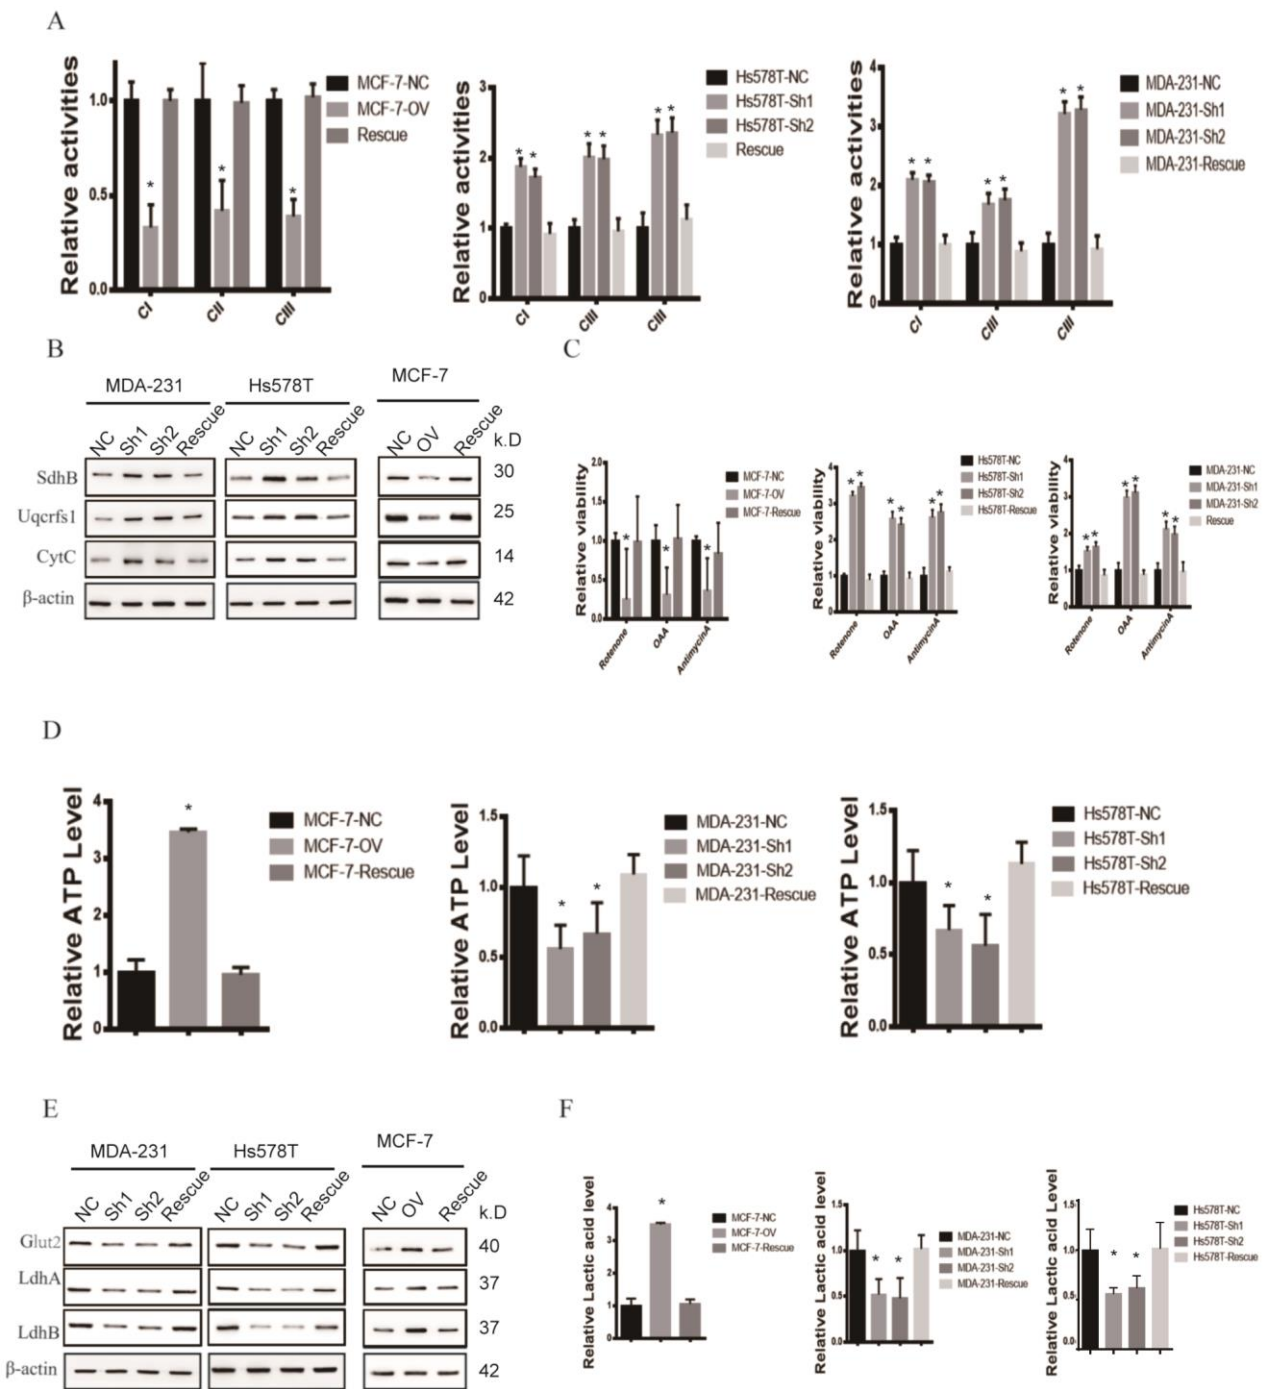

**Figure 6. MTR promotes the glycolysis of BC in a HIF1 $\alpha$ - and HIF2 $\alpha$ -dependent manner. (A)** The relative activities of the CI CII and CIII of different cell lines (Student's two one-tailed paired test \*  $p < 0.05$ ). **(B)** Western blot of OXPHOS markers of different cell lines. **(C)** The relative viability of different cell lines treated with different inhibitors (Student's two one-tailed paired test \*  $p < 0.05$ ). **(D)** The relative ATP level of different cell lines (Student's two one-tailed paired test \*  $p < 0.05$ ). **(E)** Western blot of glycolysis markers of different cell lines. **(F)** The relative lactic acid level of different cell line (Student's two one-tailed paired test \*  $p < 0.05$ ).
